# Supplementary material for: Zr-containing UiO-66 metal–organic frameworks as efficient heterogeneous catalysts for glycerol valorization: synthesis of hyacinth and other glyceryl acetal fragrances
Source: Royal Society of Chemistry journal article supplement (doi:10.1039/d2me00255h), 2023-01-01
Supplement: d2me00255h1.pdf [file d2me00255h1.pdf]

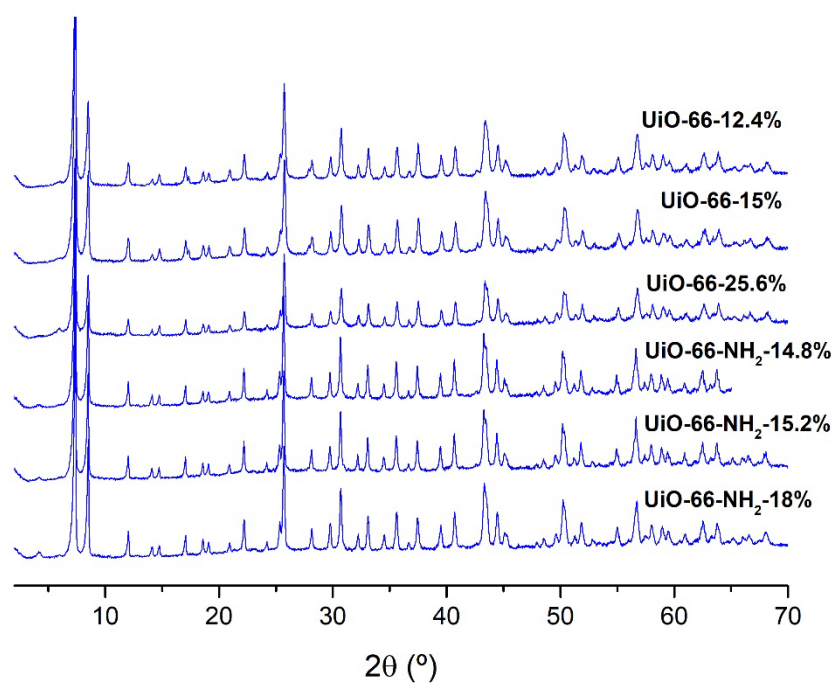

Figure S1. XRD patterns of UiO-66-X and UiO-66-NH<sub>2</sub>-X with different amount of linker defects X (%)

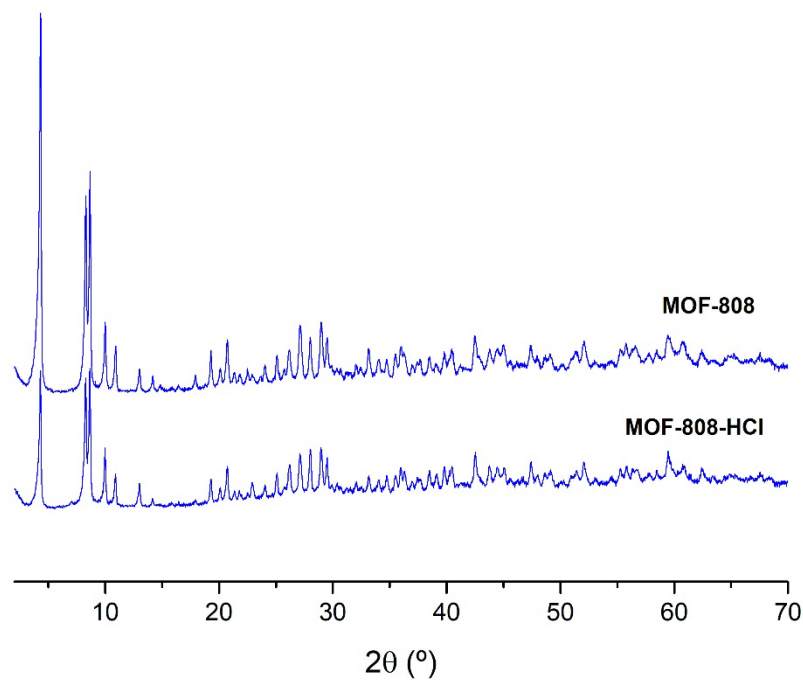

Figure S2. XRD patterns of MOF-808 and MOF-808-HCl

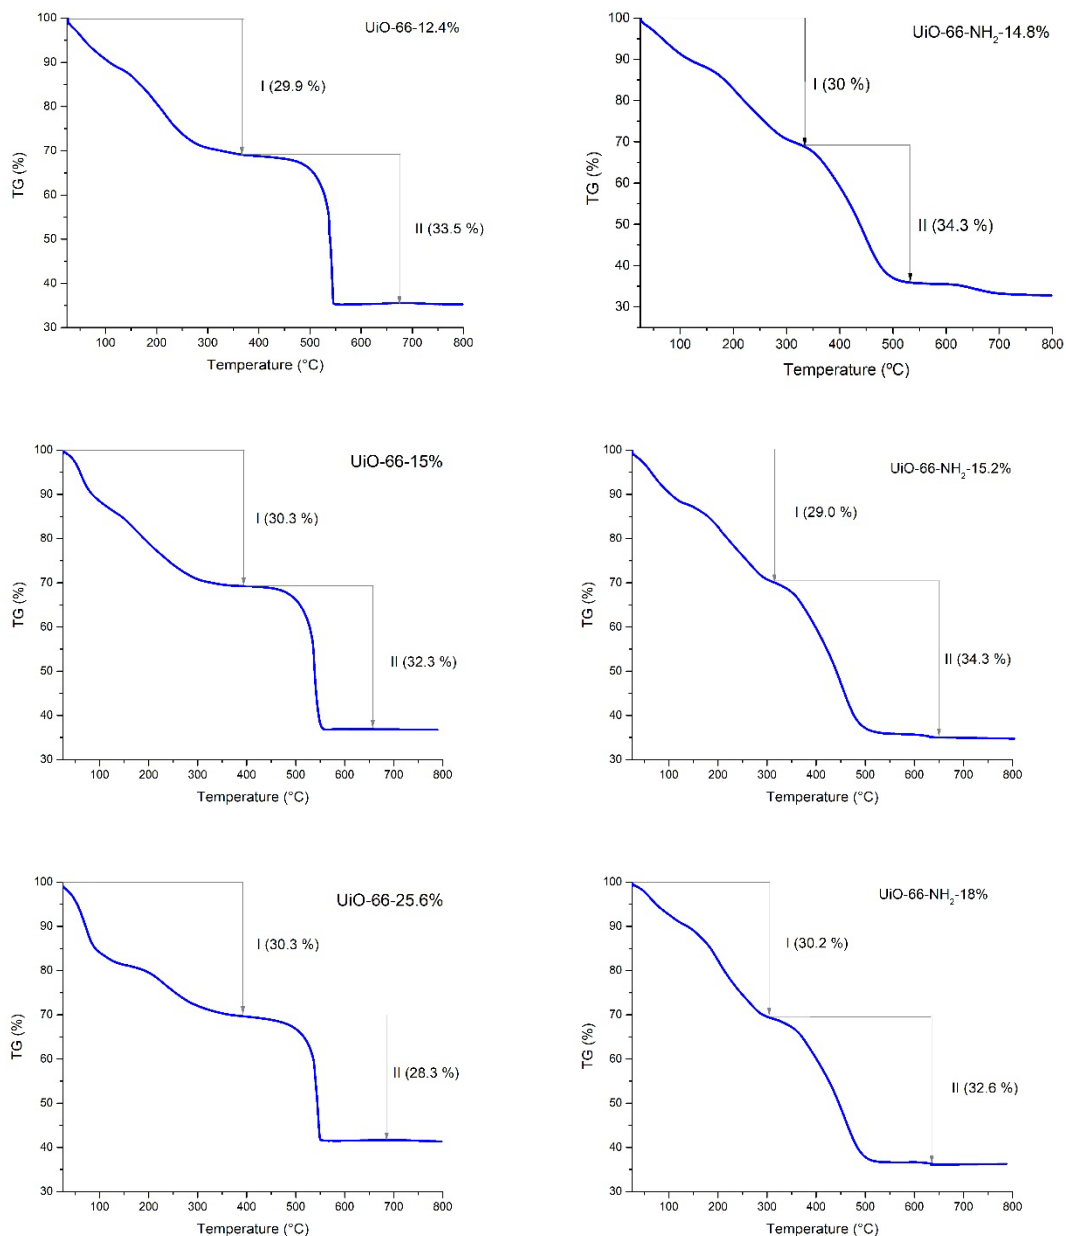

Figure S3. Thermograms of UiO-66-X and UiO-66-NH<sub>2</sub>-X samples with different amount of linker defects: *I*-water and solvent weight loss; *II* – organic ligand weight loss

### Determination of the amount of missing linkers in UiO-66

The percentage of linker defects was calculated following the method proposed by Valenzano<sup>1</sup> using TG data (Figure S3). When UiO-66 is dehydrated and dehydroxylated (in the range of 300-500 °C according to TGA) its structure corresponds to the formula  $ZrO(CO_2)_2(C_6H_4)$ . Assuming that only  $ZrO_2$  is formed as residue at high temperature (500-550 °C), it is possible to calculate

the experimental weight loss corresponding to the organic linker using TG analysis and compare it with the theoretical weight loss expected from the ideal structure of UiO-66.

In this way, the percentage of linker defects and the coordination number of the  $Zr_6$  clusters (CN) can be calculated using the following equations:

$$\% \text{ defect sites} = \left( 1 - \frac{\text{wt. \% real}}{\text{wt. \% theor}} \right) \times 100$$

$$CN = 12 \times \left( 1 - \frac{\% \text{ defect sites}}{100} \right)$$

where *% defect sites* corresponds to the amount of missing linkers (BDC) of UiO-66; *wt.% exp.* is the weight loss of UiO-66 associated to BDC linkers determined from TG experimental data; *wt.% theor* corresponds to the amount of BDC linkers calculated for stoichiometrically perfect structure of UiO-66 (i.e., 54.6 wt%); and *CN* is the coordination number of zirconium clusters. In the ideal structure of UiO-66-Zr, the coordination number is 12.

TablaS1. Results of N<sub>2</sub> adsorption analysis of UiO-66 and UiO-66-NH<sub>2</sub> catalysts with different number of defects

| Catalyst                      | Area BET <sup>a</sup><br>(m <sup>2</sup> g <sup>-1</sup> ) | Pore volume <sup>b</sup><br>(cm <sup>3</sup> g <sup>-1</sup> ) |
|-------------------------------|------------------------------------------------------------|----------------------------------------------------------------|
| UiO-66 -12.4%                 | 1262                                                       | 0.47                                                           |
| UiO-66 -15%                   | 1217                                                       | 0.45                                                           |
| UiO-66 -25.6%                 | 1027                                                       | 0.38                                                           |
| UiO-66-NH <sub>2</sub> -14.8% | 938                                                        | 0.36                                                           |
| UiO-66-NH <sub>2</sub> -15.2% | 935                                                        | 0.36                                                           |
| UiO-66-NH <sub>2</sub> -18%   | 1034                                                       | 0.39                                                           |

<sup>a</sup> For the calculation of the Brunauer-Emmett-Teller (BET) specific surface areas, the 0.005-0.06 P/P<sub>0</sub> pressure range of the isotherm was used to fit the data. Within this range, all the Rouquerol<sup>2</sup> consistency criteria are satisfied.

<sup>b</sup> Micropore volume obtained by the t-plot method.

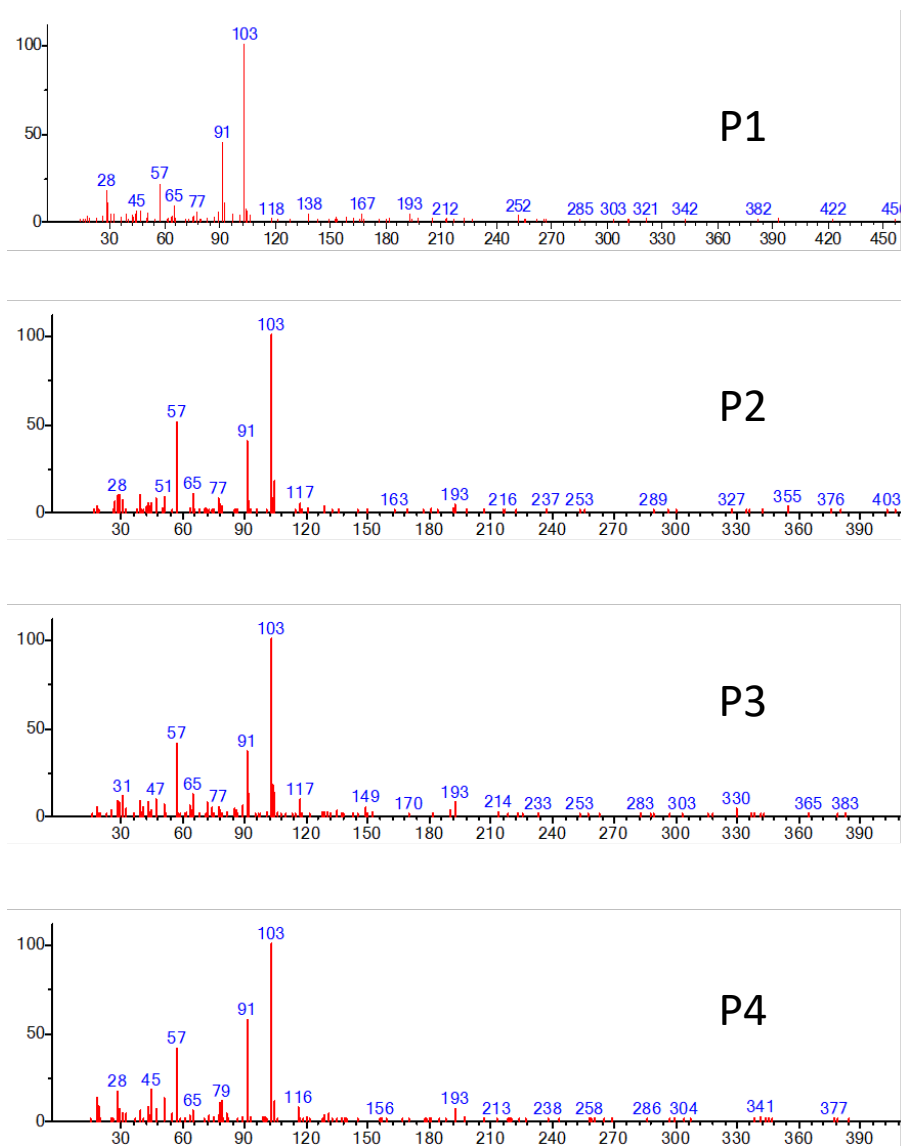

Figure S4. MS spectra of phenylacetaldehyde glycerol acetals. P1 and P4: *E* and *Z*-1,3-dioxanes; P2 and P3: *E* and *Z*-1,3-dioxolanes.

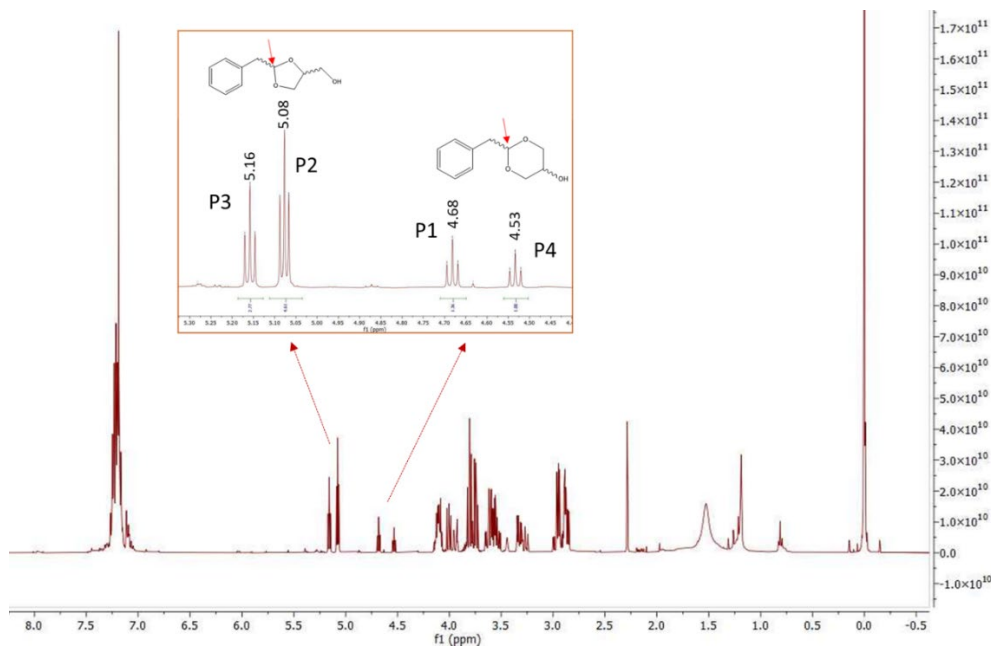

Figure S5.  $^1\text{H}$ -RMN spectra of phenylacetaldehyde-glycerol acetalization products: P2 /P3 are *E/Z* 1,3-dioxolanes; P1/P4 are *E/Z* 1,3-dioxanes.

Table S2. Results of  $^1\text{H}$ -RMN and GC quantitative analysis of phenylacetaldehyde-glycerol acetalization products

| Product       | Acetal | $\delta$ (ppm)<br>(RMN) | Yield % (RMN) | Ret.time, min<br>(GC) | Yield %<br>(GC) |
|---------------|--------|-------------------------|---------------|-----------------------|-----------------|
| 1,3-dioxane   | P1     | <i>t</i> , 4.68         | 13.9          | 13.02                 | 13.8            |
|               | P4     | <i>t</i> , 4.53         | 10.2          | 13.55                 | 9.5             |
| 1,3-dioxolane | P2     | <i>t</i> , 5.08         | 47.3          | 13.07                 | 47.8            |
|               | P3     | <i>t</i> , 5.16         | 28.6          | 13.27                 | 28.9            |

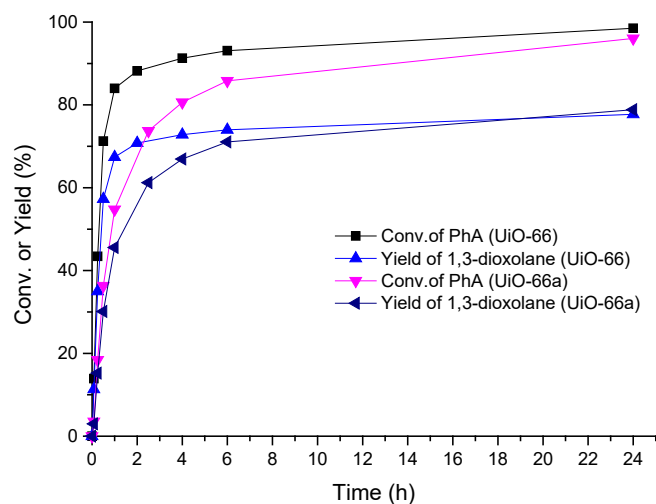

Figure S6. Conversion & time and Yield & time plots for acetalization reaction of phenylacetaldehyde with glycerol in presence of hydrated UiO-66 and UiO-66a dehydrated at  $150^\circ\text{C}$  under vacuum conditions (2h) before reaction. Reaction conditions: PhA (2 mmol), Gly (4 mmol), MOF (1.5 mol%Zr) 10 mg, reflux of toluene (6 mL), Dean Stark.

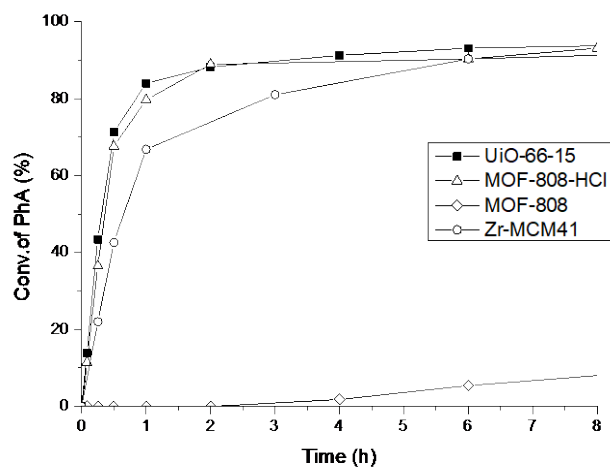

Figure S7. Conversion & time plots for acetalization reaction of phenylacetaldehyde with glycerol in the presence of various Zr-containing catalysts.

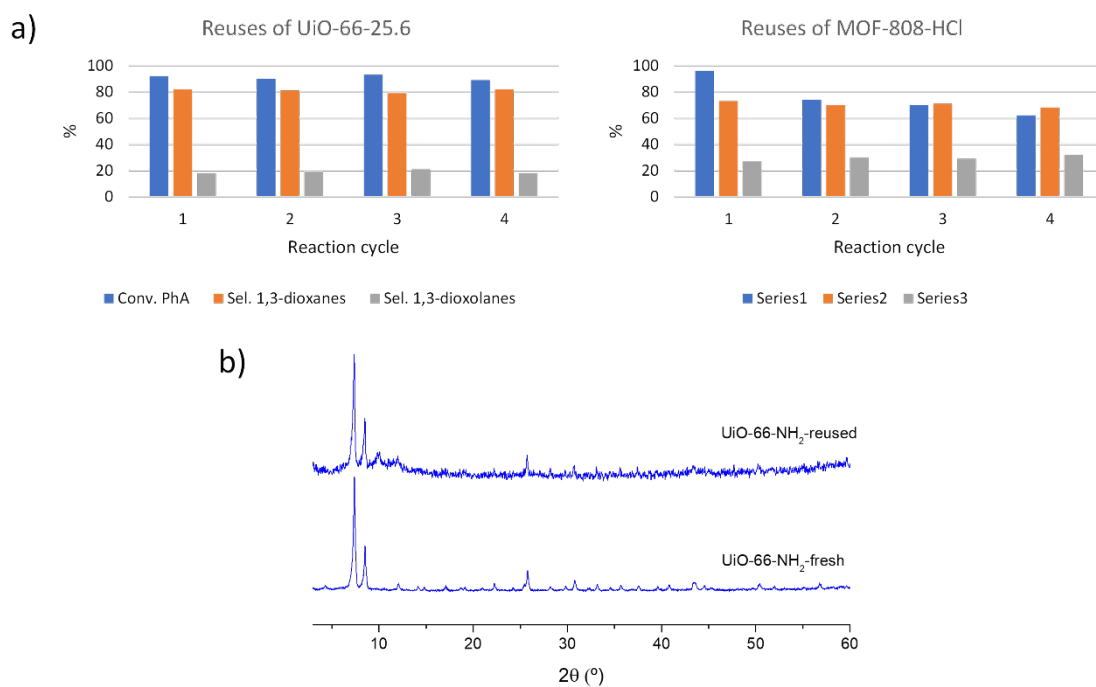

Figure S8. a) Results of consecutive reuses of UiO-66-25.6 and MOF-808-HCl samples in acetalization reaction of phenylacetaldehyde with glycerol after 6 h. b) XRD patterns of UiO-66-NH<sub>2</sub>-18 catalyst before (fresh) and after being used in reaction for four consecutive cycles.

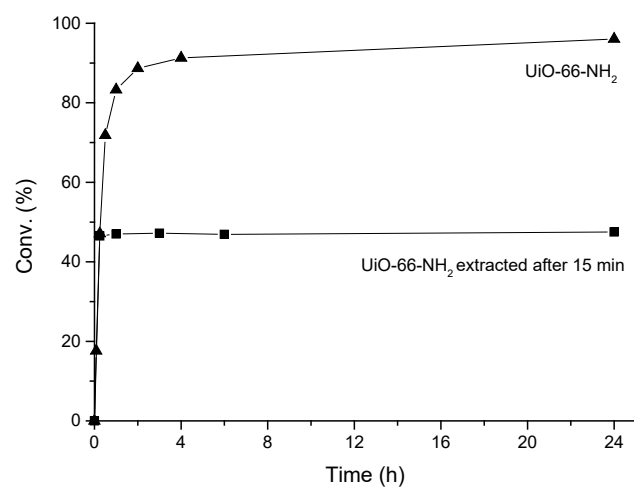

Figure S9. Conversion & time plots for acetalization reaction of phenylacetaldehyde with glycerol in presence of UiO-66-NH<sub>2</sub> (▲) and after removal of UiO-66-NH<sub>2</sub> (■) at 15 min of reaction.

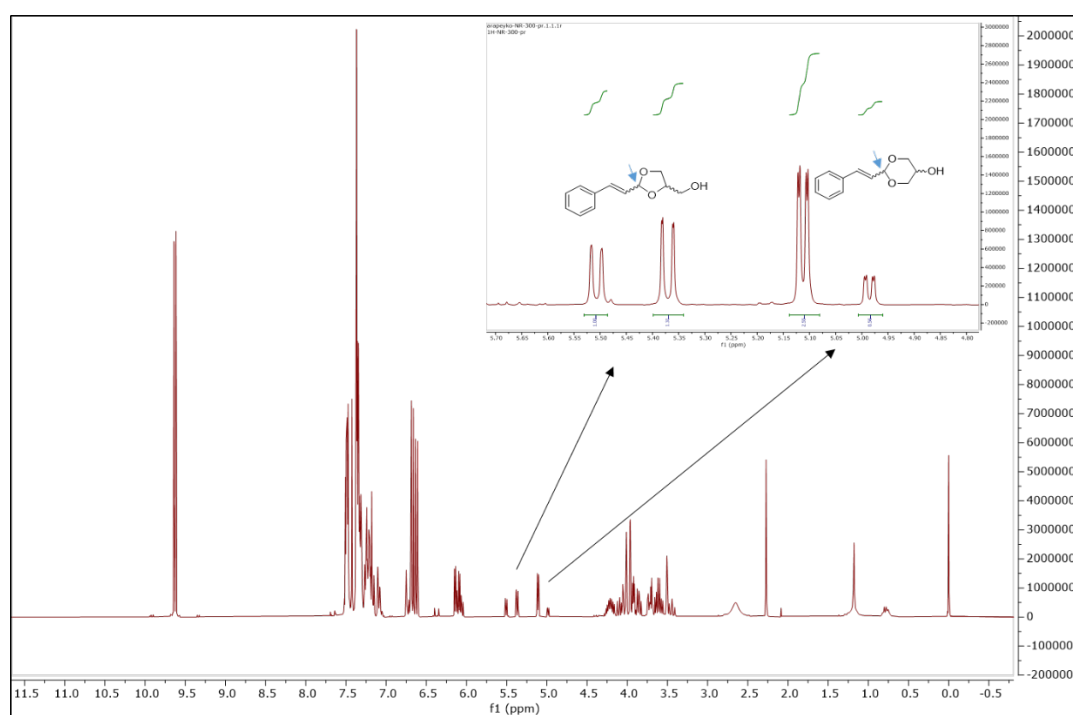

Figure S10. <sup>1</sup>H-NMR spectrum of cinnamaldehyde-glycerol acetalization products.

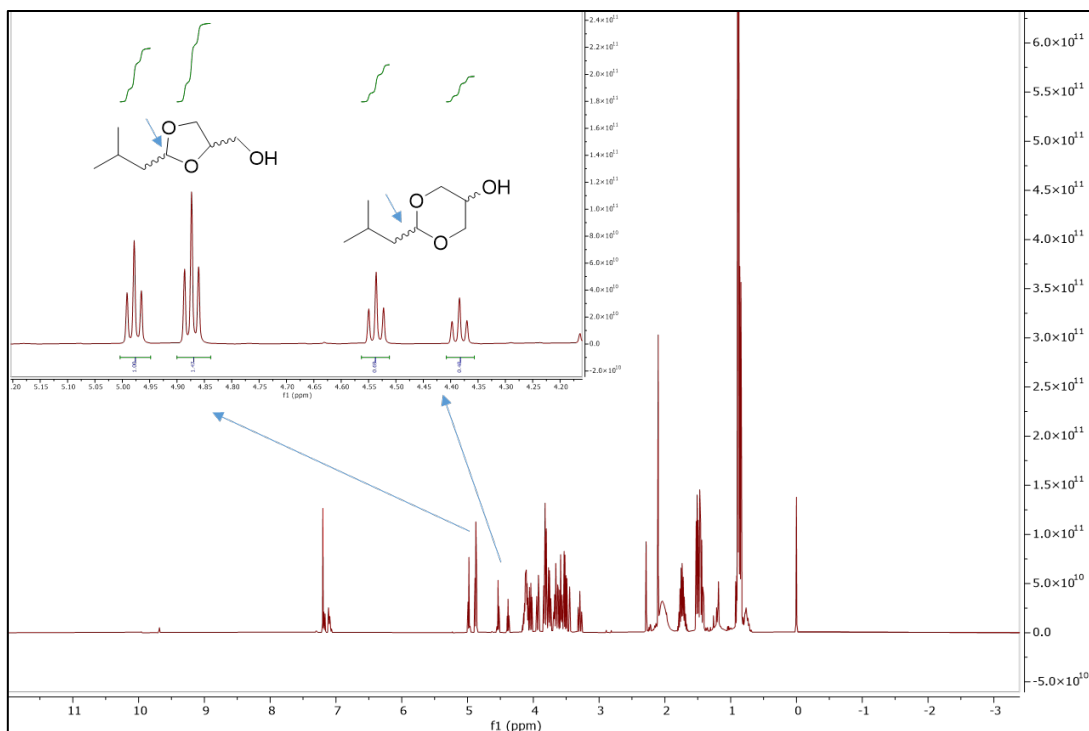

Figure S11.  $^1\text{H-NMR}$  spectrum of isovaleraldehyde-glycerol acetalization products.

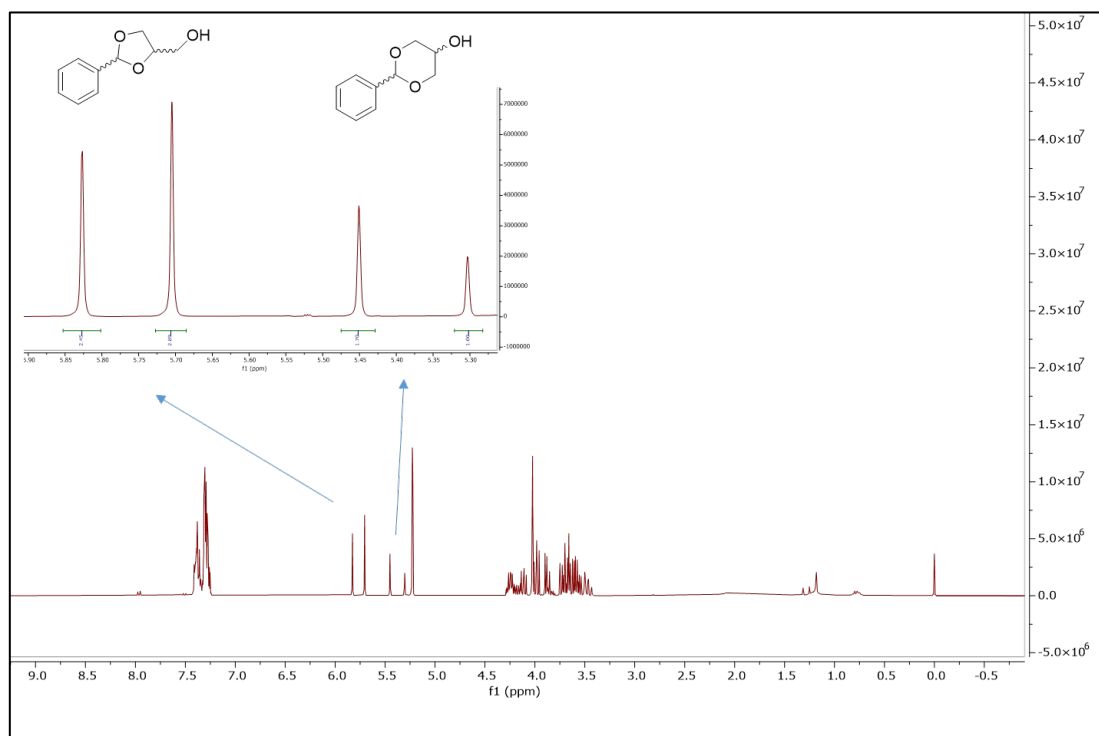

Figure S12.  $^1\text{H-NMR}$  spectrum of benzaldehyde-glycerol acetalization products.



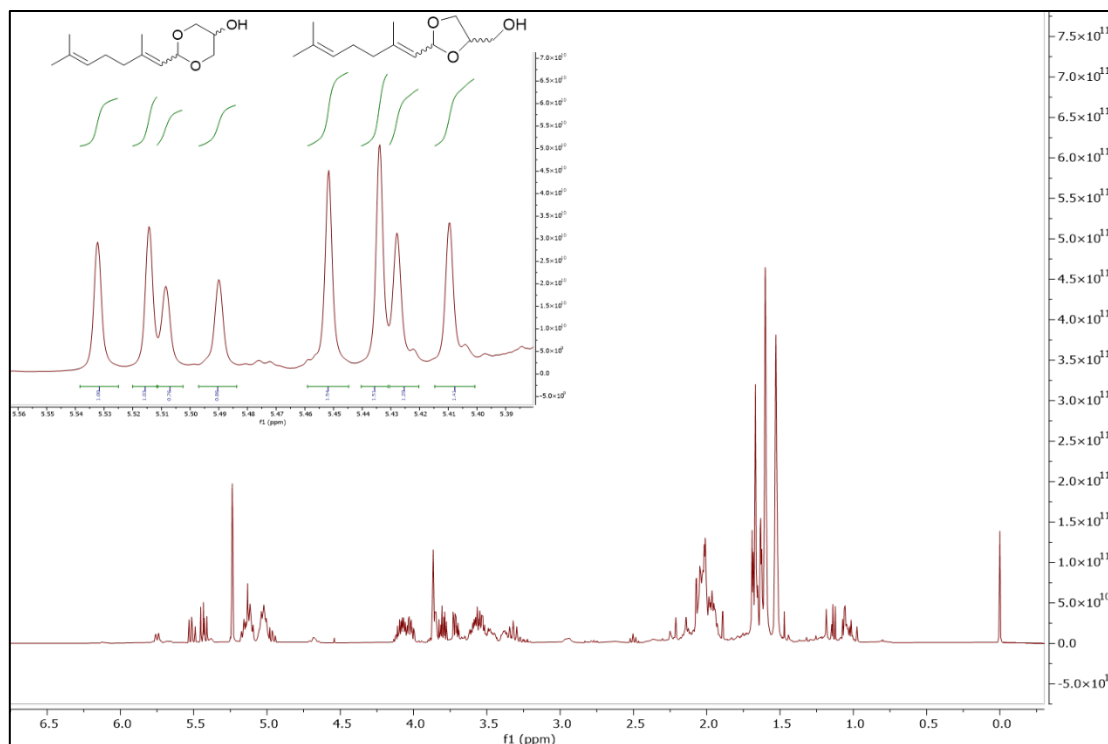

Figure S13.  $^1\text{H-NMR}$  spectrum of citral (mixture of neral and geranial)-glycerol acetalization products.

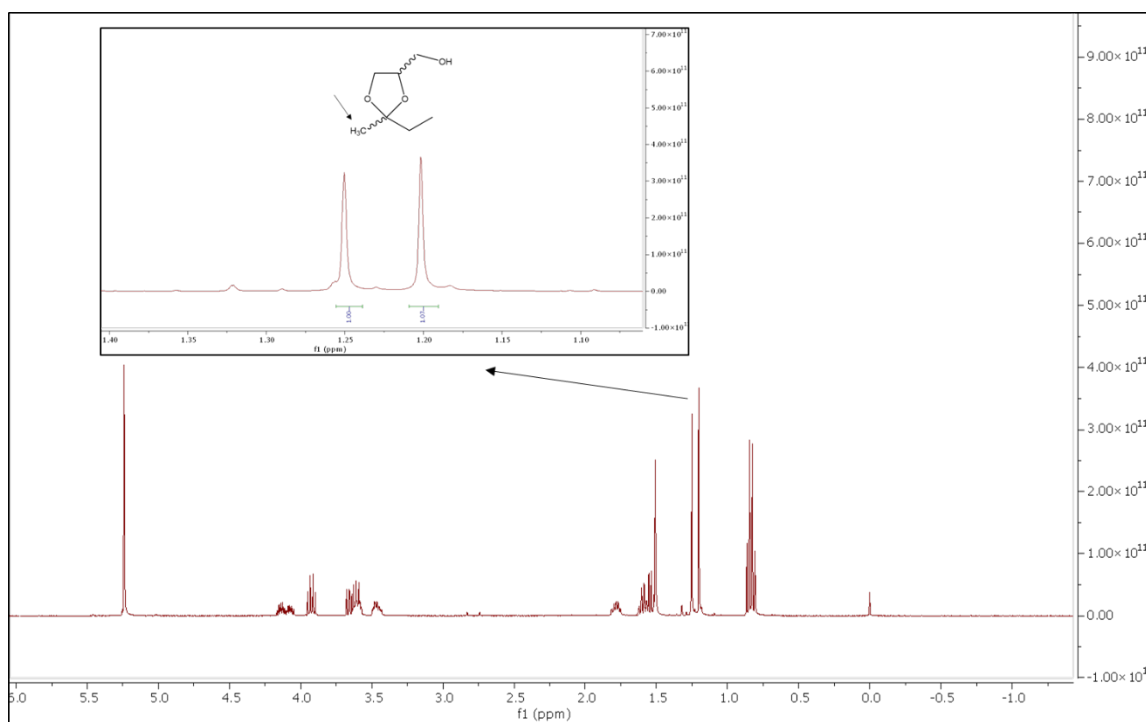

Figure S14.  $^1\text{H-NMR}$  spectrum of 2-butanone-glycerol acetalization products.

## References

- 1 L. Valenzano, B. Civaleri, S. Chavan, S. Bordiga, M. H. Nilsen, S. Jakobsen, K. P. Lillerud and C. Lamberti, *Chemistry of Materials*, 2011, **23**, 1700–1718.
- 2 J. Rouquerol, P. Llewellyn and F. Rouquerol, *Studies in Surface Science and Catalysis*, 2007, **160**, 49–56.
